# Supplementary material for: Preparticipation Screening of Athletes: The Prevalence of Positive Family History
Source: MDPI journal article supplement (doi:10.3390/jcdd10040183), 2023-04-21
Supplement: s1 [file s1]

# Supplementary Materials:

| Sample 1-Sample 2 | Test Statistic | Std. Error | Std. Test Statistic | Sig.  | Adj. Sig. <sup>a</sup> |
|-------------------|----------------|------------|---------------------|-------|------------------------|
| IOC-AHA           | 0.147          | 0.040      | 3.647               | 0.000 | 0.002                  |
| IOC-FIFA          | -0.316         | 0.040      | -7.854              | 0.000 | 0.000                  |
| IOC-PPE-4         | 0.390          | 0.040      | 9.678               | 0.000 | 0.000                  |
| AHA-FIFA          | -0.169         | 0.040      | -4.208              | 0.000 | 0.000                  |
| AHA-PPE-4         | -0.243         | 0.040      | -6.031              | 0.000 | 0.000                  |
| FIFA-PPE-4        | 0.073          | 0.040      | 1.823               | 0.068 | 0.410                  |

Each row tests the null hypothesis that the Sample 1 and Sample 2 distributions are the same. Asymptotic significances (2-sided tests) are displayed. The significance level is .050.

<sup>a</sup> Significance values have been adjusted by the Bonferroni correction for multiple tests.

**Supplementary Table S1:** Statistical comparison of positive family history analysis between four different PPS systems. The results of the pairwise comparison between the four PPS systems (PPE-4, FIFA, AHA, IOC) in terms of significance and adjusted significance (by Bonferroni correction for multiple testing).

| FH+ in PPS     | N     | %          |
|----------------|-------|------------|
| FH+ in any PPS | 177   | 1.28%      |
| FH+PPE-5       | 19-34 | 0.14-0.25% |
| FH+ PPE-4      | 167   | 1.20%      |
| FH+ FIFA       | 154   | 1.11%      |
| FH+ AHA        | 124   | 0.89%      |
| FH+ IOC        | 98    | 0.71%      |

(a)

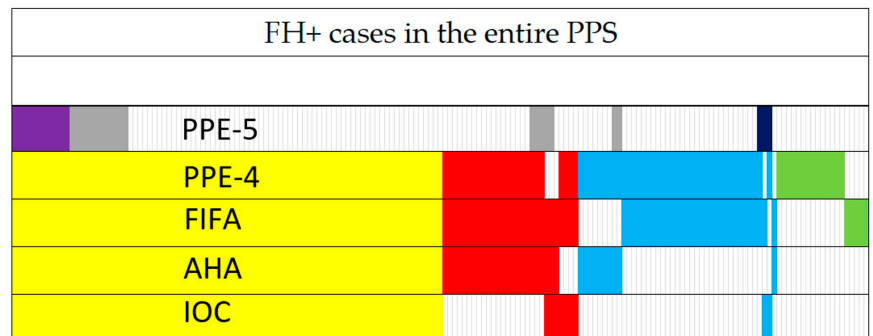

(b)

**Supplementary Figure S1:** Prevalence of positive family history in PPS systems including PPE-5. (a) The figure shows the overall prevalence (in numbers and percentages) of positive family history in each of the five PPS systems (PPE-5, PPE-4, FIFA, AHA, IOC) in separate rows. (b) Rectangles of different colors represent the distribution of cases with positive family history in each PPS system. The purple color in PPE-5 indicates probable positive family history and the grey color indicates possible positive family history using PPE-5. Please note the uncertainty in the PPE-5 results due to retrospective analysis.
